# Supplementary material
Source: publisher figshare collection journal article supplement (https://frontiersin.figshare.com/ndownloader/files/18002681)
Supplement: Supplementary file [file 18002681]

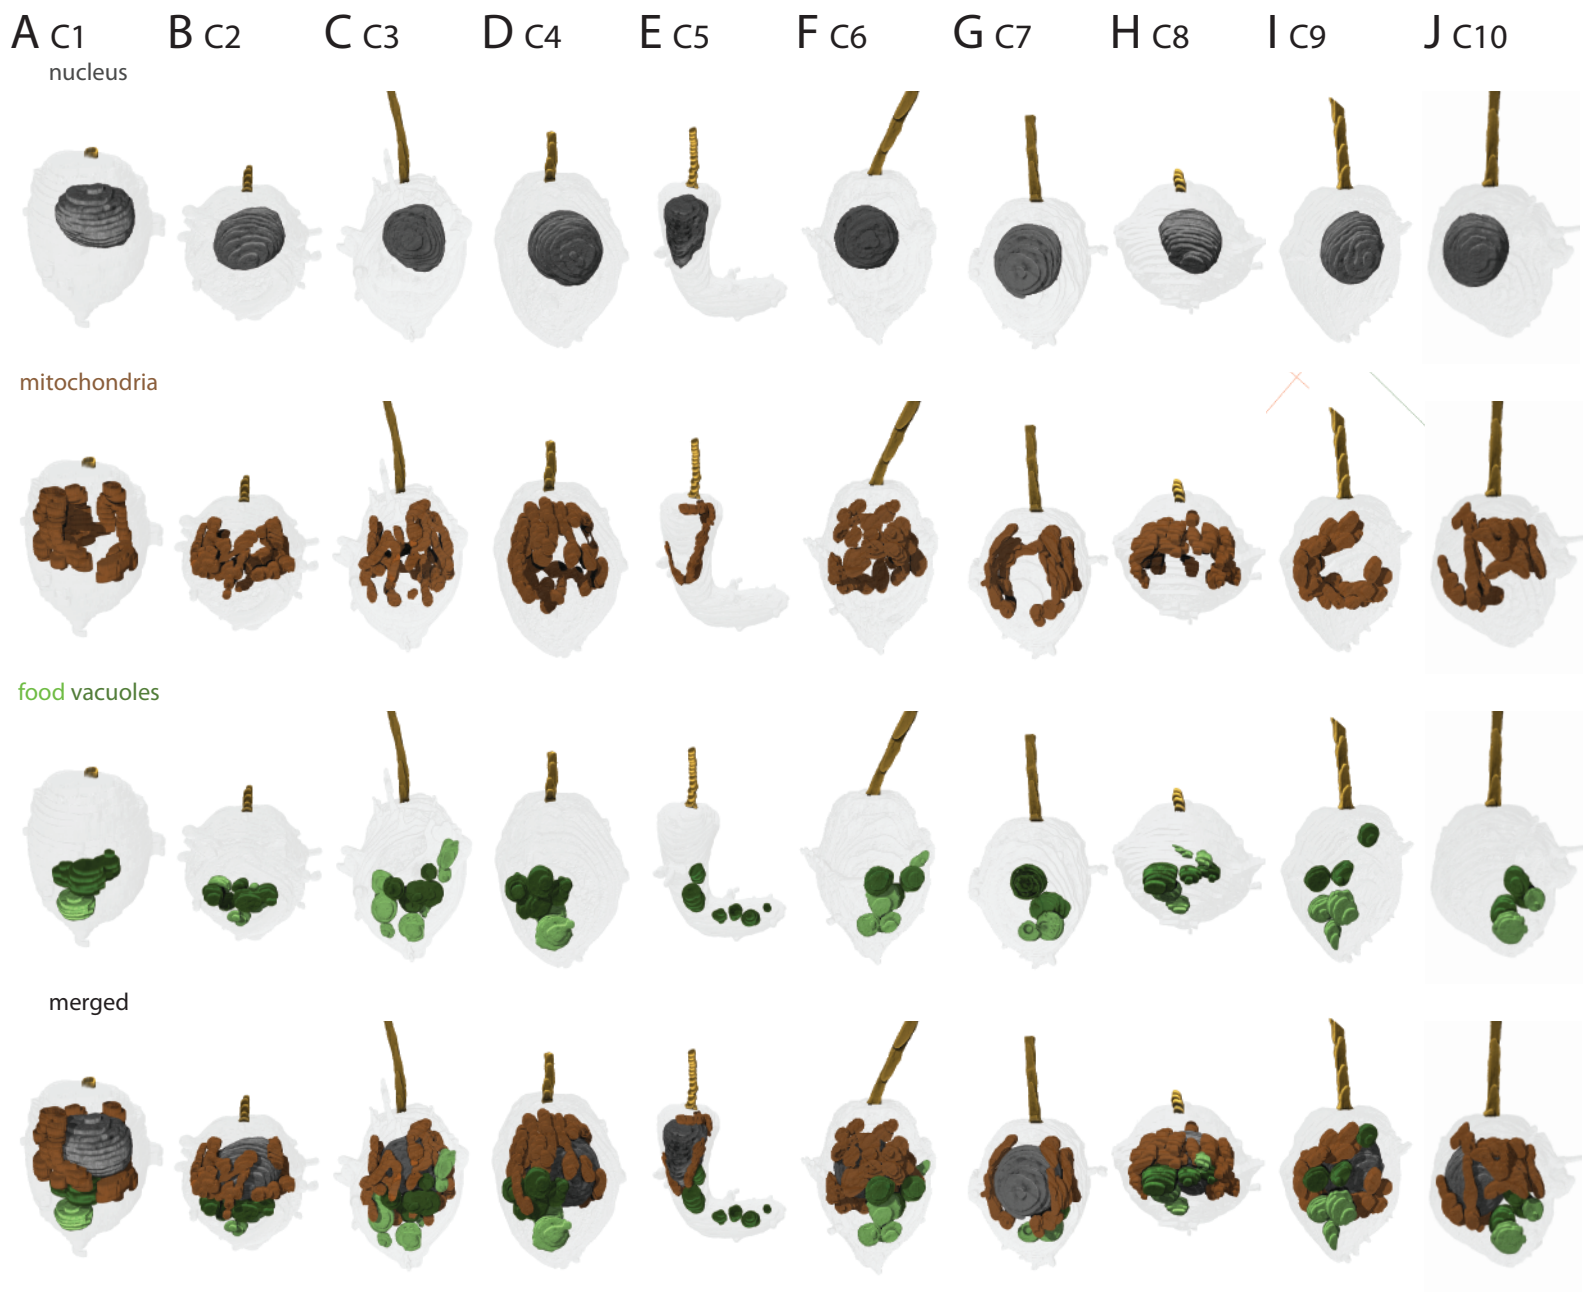

Suppl. Figure 9
